# Supplementary material for: Safety and Efficacy of Myval Implantation in Patients with Severe Bicuspid Aortic Valve Stenosis—A Multicenter Real-World Experience
Source: MDPI journal article supplement (doi:10.3390/jcm11020443), 2022-01-15
Supplement: s1 [file s1]

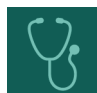

**Table S1.** Missing data of the Myval bicuspid registry.

| Data Variable                             | Missed<br>n (%) |
|-------------------------------------------|-----------------|
| Age                                       | 0               |
| Body surface area (BSA)                   | 0               |
| <b>BAV type (Sievers' classification)</b> | 6 (9%)          |
| STS score                                 | 10 (15%)        |
| Effective orifice area (EOA)              | 18 (26%)        |
| indexed Effective orifice area (iEOA)     | 15 (22%)        |
| Transvalvular mean pressure gradient      | 5 (7%)          |
| Indexed stroke volume (iSV)               | 13 (19%)        |
| Transvalvular maximum velocity            | 13 (19%)        |
| Dimensionless velocity index (DVI)        | 17 (25%)        |
| LV ejection fraction                      | 1 (1.5%)        |
| Gender                                    | 0               |
| Peripheral vascular disease               | 0               |
| Prior atrial fibrillation                 | 0               |
| NYHA class                                | 0               |
| Arterial access                           | 1 (1.5%)        |
| Balloon pre-dilatation                    | 0               |
| Balloon post-dilatation                   | 0               |
| Implanted Myval size                      | 0               |
| Conversion to surgery                     | 0               |
| Coronary obstruction                      | 0               |
| Aortic root injury                        | 0               |
| Implantation of the second valve          | 0               |
| Major vascular complications              | 0               |
| Life-threatening or disabling bleeding    | 0               |
| Procedural Death                          | 0               |
| Post TAVI aortic regurgitation            | 0               |
| Pacemaker implantation                    | 0               |
| Stroke                                    | 0               |
| Acute kidney injury stage II or III       | 0               |
| Aortic valve reintervention               | 0               |
| 30-Day all-cause death                    | 0               |

**Table S2.** the collaborating centres and number of patients of the Myval bicuspid registry.

| The Centre                                                      | The Country | No. of Patients |
|-----------------------------------------------------------------|-------------|-----------------|
| Christian Medical College & Hospital (CMC) VELLORE              | India       | 12              |
| Aarhus University Hospital (AUH), Aarhus                        | Denmark     | 11              |
| Odense University Hospital, Odense                              | Denmark     | 11              |
| Apollo Main Hospital, Chennai, India                            | India       | 8               |
| Fortis Escorts Heart Institute (FEHI), New Delhi.               | India       | 8               |
| Apollo Hospitals, Apollo Health City, Jubilee Hills, Hyderabad. | India       | 4               |
| IRCCS Policlinico San Donato, Milan.                            | Italy       | 4               |
| King George's Medical University (KGMU) – Lucknow.              | India       | 2               |
| Care Institute of Medical Sciences (CIMS) Hospital, Ahmedabad.  | India       | 2               |
| Asian Heart Institute, Mumbai.                                  | India       | 2               |
| Istituto Clinico S.Ambrogio, Milan.                             | Italy       | 2               |
| University Hospital Dubrava, Zagreb                             | Croatia     | 2               |
